# Supplementary material for: Promoting electrocatalytic CO2methanation using a molecular modifier on Cu surfaces
Source: Royal Society of Chemistry journal article supplement (doi:10.1039/d2ta07266a), 2022-01-01
Supplement: d2ta07266a1.pdf [file d2ta07266a1.pdf]

- 1 *Supplementary Information for*
- 2 **Promoting electrocatalytic CO<sub>2</sub> methanation using a molecular modifier on Cu surfaces**
- 3

## 1 Experimental Details

### 2 Chemicals and materials

3 1,2-Benzenethiol (BDT, >95.0%) was purchased from Aladdin Co. Ltd. (Shanghai, China). Copper  
4 (II) nitrate trihydrate ( $\text{Cu}(\text{NO}_3)_2 \cdot 3\text{H}_2\text{O}$ , >99.0%), copper (II) acetate, ethanol ( $\text{C}_2\text{H}_5\text{OH}$ , >99.5%), N,  
5 N-dimethylacetamide (DMF, >98.0%), toluene ( $\text{C}_7\text{H}_8$ , >98.0%), and hexane ( $\text{C}_6\text{H}_{14}$ , >96.0%), 1-  
6 amino-2-propanol (AmIP, >98.0%), hydrazine monohydrate ( $\text{H}_6\text{N}_2\text{O}$ , >85.0%), potassium hydroxide  
7 (KOH,  $\geq 99.5\%$ ) were purchased from Sinopharm Chemical Reagent Co. Ltd. (Shanghai, China).  
8 Nafion solution (~5% wt), ethylene glycol ( $\text{C}_2\text{H}_6\text{O}_2$ ,  $\geq 99.5\%$ ), 1-propanesulfonic acid 3-  
9 (trimethylsilyl) sodium salt (DSS), (methyl sulfoxide)- $\text{d}_6$  (DMSO- $\text{d}_6$ ), and Nafion 115 membranes  
10 were all purchased from Sigma-Aldrich. All the chemicals were used without further purification.  
11 Ultrapure Millipore water (resistivity 18.2  $\text{M}\Omega \text{ cm}$ ) was used for all experiments.

12

### 13 Synthesis of Cu nanoparticles (Cu NPs)

14 The Cu NPs were synthesized using a previously reported method with slight modification.<sup>[1]</sup>  
15 Typically, 15 mL of AmIP was added to 30 mL of ethylene glycol. Copper (II) acetate (2.73 g) was  
16 added to the AmIP solution in an ice bath, producing a blue solution. Then, hydrazine monohydrate  
17 (7.3 mL) was added to the blue solution under stirring at 800 rpm and room temperature. After the  
18 above reaction for around 24 h, blackish deep red products were collected by centrifugation and  
19 washed with DMF, toluene, and hexane.

20

### 21 Synthesis of Cu BDT

22  $\text{Cu}(\text{NO}_3)_2 \cdot 3\text{H}_2\text{O}$  (483.18 mg, 2 mmol) and 1,2-Benzenedithiol (284.46 mg, 2 mmol) were dissolved  
23 in ethanol (5 mL) separately. Then, the solution of BDT was added to  $\text{Cu}(\text{NO}_3)_2$  solution dropwise  
24 and stirred at room temperature, giving black powder (305.64 mg, 1.5 mmol, ~75% yield). The black  
25 solid was washed with ethanol and deionized water three times and was dried in an oven at 120 °C to  
26 obtain pure Cu BDT products.<sup>[2]</sup>

27

### 28 Preparation of the working electrode

29 3.2 mg of catalyst was dispersed in 2 mL of  $\text{C}_2\text{H}_5\text{OH}$  by sonicating for 10 minutes, and then 35  $\mu\text{L}$  of  
30 Nafion solution (~5 wt.%) was added and sonicated for another 30 minutes to get a uniform ink. The  
31 obtained ink was spray-coated on 4 cm  $\times$  4 cm carbon paper (Sigracet 29BC). The prepared electrodes

1 were dried in the ambient environment. The prepared electrode was electrochemically reduced at a  
 2 constant voltage of  $-1.5$  V (vs Ag/AgCl) for 20 mins to obtain working electrode.

### 4 **Electrochemical measurements**

5 All CO<sub>2</sub> electroreduction experiments were carried out in a flow cell that was controlled by an  
 6 electrochemical workstation (CHI 1140C). The anolyte and catholyte were pumped through the flow-  
 7 cell devices using a peristaltic pump (BT100-2J, LONGER) at a flow rate of 50 rpm and separated  
 8 by a proton exchange membrane (Nafion 115). As an electrolyte, 1 M KOH was used. The flow cell  
 9 system's effective test area was  $1 \times 1$  cm<sup>2</sup>. The counter electrode and reference electrode were Pt wire  
 10 and Ag/AgCl (3M KCl), respectively. The CO<sub>2</sub> flow rate was set at 20 sccm. All potentials were  
 11 measured Ag/AgCl scale and converted to the RHE scale with  $iR$  compensation according to the  
 12 following equation:

$$13 \quad E \text{ (vs RHE)} = E \text{ (vs Ag/AgCl)} + 0.210 \text{ V} + 0.059 \times \text{pH} + iR$$

14 where  $i$  is the mean current at each applied potential and  $R$  is solution resistance determined by  
 15 experiments of electrochemical impedance spectroscopy (EIS) in a frequency range from 10 to 10<sup>6</sup>  
 16 Hz with an amplitude of 5 mV.

### 18 **The quantitative methods of products in CO<sub>2</sub>RR**

19 The gaseous products of CO<sub>2</sub> electroreduction were analyzed by online gas chromatography (GC  
 20 2014, Shimadzu) equipped with a flame ionization detector (FID) and thermal conductivity detector  
 21 (TCD). Faradaic efficiency (FE) of H<sub>2</sub>, CO, C<sub>2</sub>H<sub>4</sub>, and CH<sub>4</sub> products were calculated following the  
 22 equation:

$$23 \quad \text{FE}_{\text{gas}} (\%) = \frac{i_{\text{gas}}}{i_{\text{total}}} \times 100 = \frac{C_{\text{gas}} \times V_{\text{gas}} \times \frac{p_0}{RT} \times N \times F}{i_{\text{total}}} \times 100$$

24  $i_{\text{gas}}$  : the partial currents of gas products.

25  $i_{\text{total}}$  : the total current was measured by the potentiostat.

26  $C_{\text{gas}}$  : the volume concentration of gas products, based on the calibration of GC.

27  $V_{\text{gas}}$  : flow rate of the input gas (95% CO<sub>2</sub>, 5% N<sub>2</sub> as internal standard).

1  $P_0$  : atmospheric pressure.

2  $R$  : ideal gas constant, 8.314 J mol<sup>-1</sup> K<sup>-1</sup>.

3  $T$  : room temperature, 298.15 K.

4  $N$  : the number of electrons transferred for the product formation.

5  $F$  : Faraday constant, 96485 C mol<sup>-1</sup>.

6 The liquid products were detected using <sup>1</sup>H NMR spectroscopy (AVANCE AV III 400, Bruker).

7 Typically, 400 μL of the electrolyte after electrolysis was mixed with 100 μL DMSO-*d*<sub>6</sub> and 100 μL

8 of 6.0 mM DSS aqueous solution. DSS solution serves as an internal standard. The area ratio of the

9 liquid product peaks to the DSS peaks was compared to quantify the concentration of liquid products.

10 The FE for the liquid product was calculated following the equation:

11 
$$FE_{liquid} (\%) = \frac{C_{liquid} \times V_{liquid} \times N \times F}{Q_{total}} \times 100$$

12  $C_{liquid}$  : concentration of the liquid product.

13  $V_{liquid}$  : volume of the electrolyte.

14  $Q_{total}$  : quantity of electric charge integrated by the potentiostat.

15

16 **The calculated methods for the double-layer capacitance ( $C_{dl}$ ) and electrochemical surface area**  
17 **(ECSA).**

18 Double-layer capacitance ( $C_{dl}$ ) was determined by measuring the capacitive current associated with

19 double-layer charging from the scan-rate dependence of cyclic voltammogram (CV). The CV curves

20 ranged from 0.825 V to 0.875 V vs RHE. The  $C_{dl}$  was estimated by plotting the  $\Delta j$  ( $\Delta j = (j_a - j_c)/2$ ) at

21 0.85 V vs RHE against the scan rates, in which the  $j_a$  and  $j_c$  were the anodic and cathodic current

22 density, respectively. The slope is that of the  $C_{dl}$  values. The ECSA was calculated by the following

23 equation: ECSA =  $R_f \times S$ , where  $R_f$  represented the roughness factor of the Cu surface and  $S$

24 represented the surface area of the GDE (1 cm<sup>2</sup> in this case). Based on the  $C_{dl}$  of a smooth metallic

25 surface (0.029 mF cm<sup>-2</sup> for Cu surface),<sup>[3]</sup>  $R_f$  can be calculated according to the relation  $R_f = C_{dl}/0.029$

26 in this case.

27

## 1 Evaluation of Yield Rate

2 The yield rate of gas or liquid product was calculated as follows:

$$3 \text{ Yield Rate}_{gas/liquid} = \frac{i_{total} \times FE_{gas/liquid}}{N \times F \times S} \times 3600 \text{ (s)}$$

## 5 Computational methods

6 The CO<sub>2</sub> electroreduction on the benzenedithiol-modified Cu (111) surface was optimized by periodic  
7 DFT calculations using the Vienna Ab Initio Simulation Package (VASP).<sup>[4]</sup> The Perdew-Burke-  
8 Ernzerhof (PBE) functional and plane-wave basis set with a cutoff energy of 400 eV were selected  
9 for the calculations.<sup>[5]</sup> The ion-electron interaction was described using the projector-augmented  
10 plane wave (PAW) approach. A 5×5 supercell slab (14.2 Å×14.2 Å) was established for the bare Cu  
11 (111) and benzenedithiol-modified Cu (111) surface. The vacuum space along the Z direction was  
12 ~15 Å to avoid interaction between period images. The Brillouin zone was sampled by a 2×2×1 *k*  
13 points mesh. For structural optimization, the bottom two layers of the slab were fixed. At the same  
14 time, the rest atoms, including the Cu and adsorbates, were relaxed until the maximum force on the  
15 movable atoms was less than 0.02 eV Å<sup>-1</sup>. Vibrational frequency was computed without imaginary  
16 frequency to verify whether the relaxed structure was minimum. The Gibbs free energy change is  
17 defined as  $\Delta G = \Delta E + \Delta ZPE - TS$ , where  $\Delta E$  is obtained from DFT calculations,  $\Delta ZPE$  represents  
18 the corrections in zero-point energies from vibrational frequencies,  $\Delta S$  is the change of entropy, and  
19  $T$  is the absolute temperature. Entropy values of gaseous molecules and adsorbate are generated by  
20 the VASPKIT.<sup>[6]</sup> The reaction energies of \*CO protonation and C–C coupling were calculated at 0  
21 V<sub>RHE</sub>.

## 23 Characterizations

24 X-ray diffraction patterns were recorded by using a Philips X'Pert Pro Super diffractometer with Cu-  
25 K<sub>α</sub> radiation ( $\lambda = 1.54178$  Å). The morphologies of samples were recorded by SEM (Zeross Supra  
26 40) and TEM (Hitachi H-7650). HAADF-STEM and EDX mapping were taken on a field-emission  
27 transmission electron microscope (JEOL ARM-200F) operating at 200 kV accelerating voltage. The  
28 transmitted infrared spectra were carried out by Fourier transform-infrared spectroscopy (FT- IR)  
29 (Nicolet 8700). The amount of Cu loading in catalysts was determined by inductively coupled plasma  
30 atomic emission spectroscopy (ICP-AES) (Atom scan Advantage, Thermo Jarrell Ash, USA). X-ray

1 photoelectron spectroscopy (XPS) measurements were carried out on a VG ESCALAB MK II X-ray  
2 photoelectron spectrometer with an exciting source of Al  $K_{\alpha}$  = 1486.6 eV. The binding energies were  
3 corrected for specimen charging by referencing C 1s to 284.6 eV. A contact angle analyzer (Attension  
4 Theta, Biolin Scientific) was used to measure the contact angle of samples.

#### 5 ***In situ* Raman measurements**

7 We obtained in-situ Raman spectra of Cu NPs-BDT and Cu NPs under different potentials using an  
8 electrolytic cell with a three-electrode setup. The working electrode was made using the same  
9 procedure as described above but with Cu NPs-BDT as the catalyst. The counter electrode was a  
10 metal bar connected to a platinum wire going through the cell. The reference electrode was an  
11 Ag/AgCl electrode. Electrolytes containing 1 M KOH were cycled at a rate of 10 mL min<sup>-1</sup>. During  
12 the CO<sub>2</sub>RR, CO<sub>2</sub> gas was still flowing into the cell, a 785 nm laser was used to collect the catalyst  
13 surface directly, and a detector synchronously collected the Raman signals.

#### 15 ***In situ* ATR-SEIRAS measurements**

16 An FT-IR spectrometer (Nicolet iS50, Thermo Scientific) equipped with an MCT-A detector was  
17 used to collect *in situ* ATR-SEIRAS data. 4 mg of electrocatalysts, 180  $\mu$ L of C<sub>2</sub>H<sub>5</sub>OH, and 20  $\mu$ L of  
18 Nafion were combined to make the catalyst ink. The ink solution was then dripped onto the central  
19 portion of an Au film that had been chemically deposited on the basal plane of a hemicylindrical Si  
20 prism. The Si prism was built in an electrochemical cell with a Pt wire counter electrode, an Ag/AgCl  
21 electrode as a reference electrode, and 0.1 M KHCO<sub>3</sub> solution as electrolytes. Each single-beam scope  
22 had an average of 64 scans, and all spectra were acquired at a resolution of 4 cm<sup>-1</sup>. For potential  
23 control, an electrochemical workstation (CHI 660E) was used. Throughout the reaction, high-purity  
24 CO<sub>2</sub> gas was continually introduced into the electrolytes.

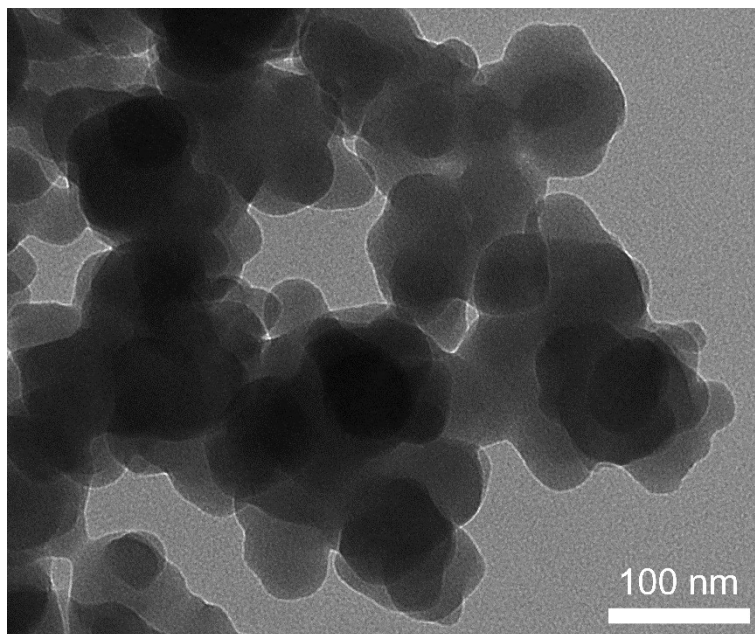

1

2 **Figure S1.** TEM of the precursor Cu BDT.

3

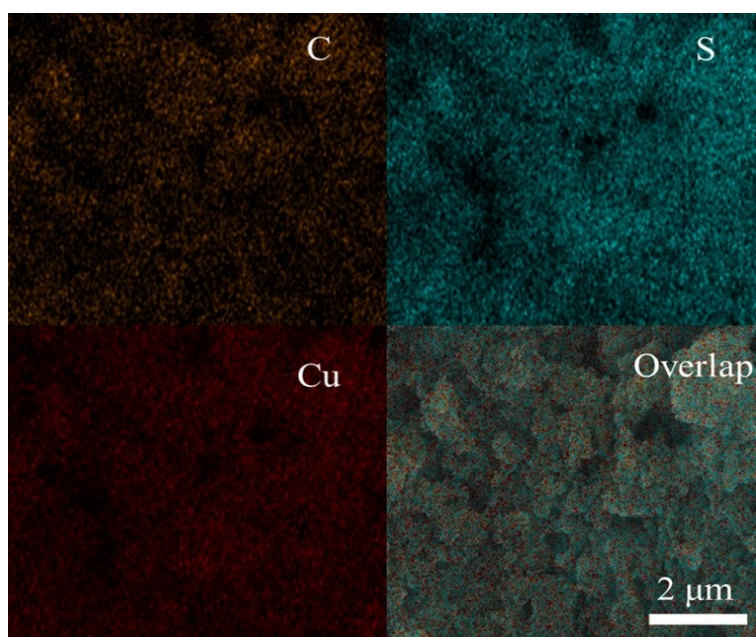

1

2 **Figure S2.** EDX mapping of the precursor Cu BDT.

3



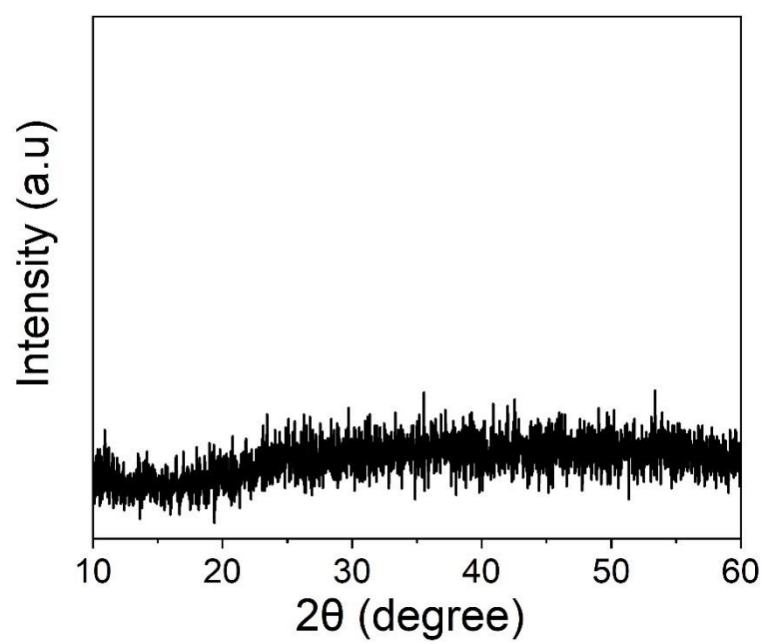

1

2 **Figure S3.** XRD patterns of the precursor Cu BDT.

3

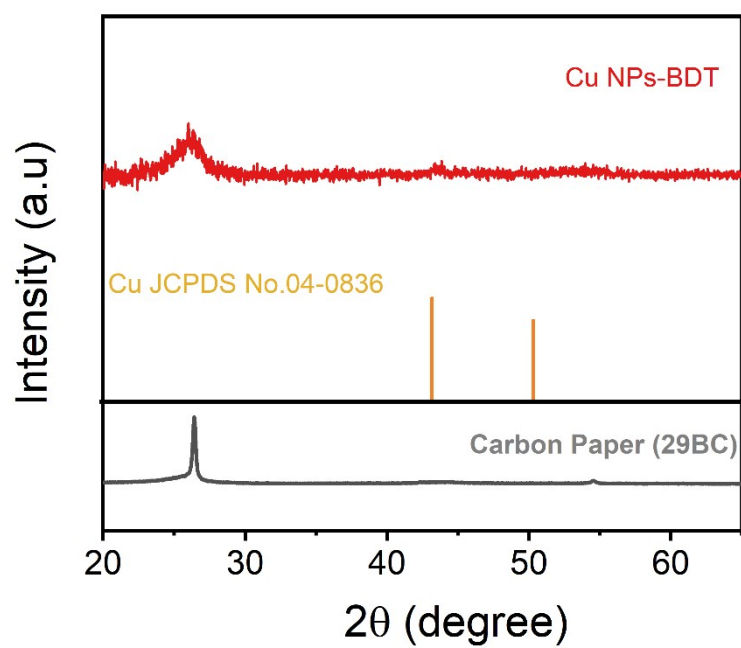

1

2 **Figure S4.** XRD patterns of Cu NPs-BDT. The prominent peaks around  $26.0^\circ$  and  $43.6^\circ$  are assigned  
3 to the carbon peaks of 29 BC Carbon paper support.

4

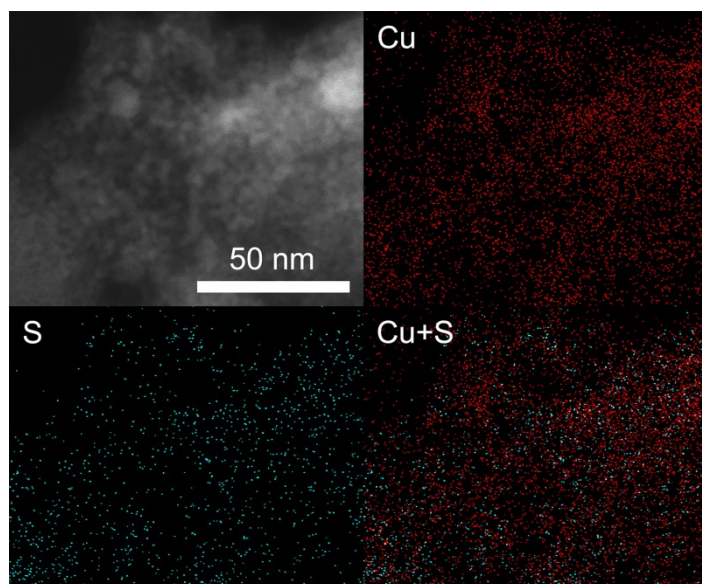

1

2 **Figure S5.** EDX mapping of BDT modified Cu NPs (Cu NPs-BDT).

3

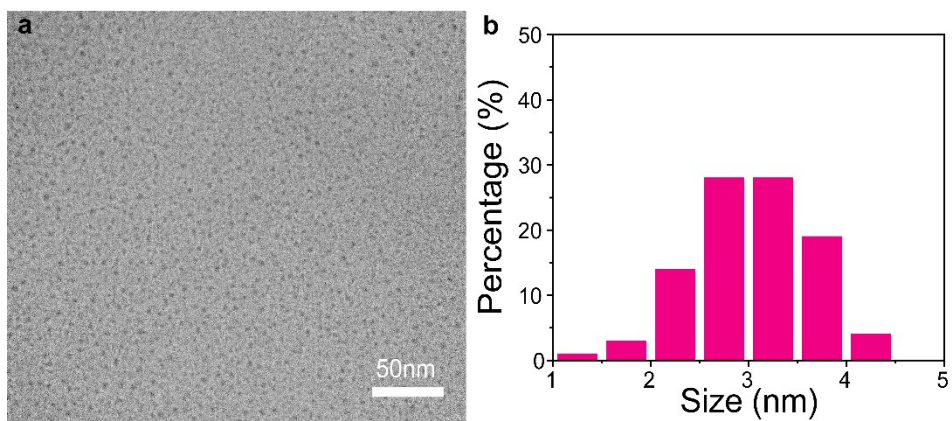

1

2 **Figure S6.** (a) TEM images of Cu nanoparticles (Cu NPs) and (b) particle size distribution of Cu  
3 NPs.

4

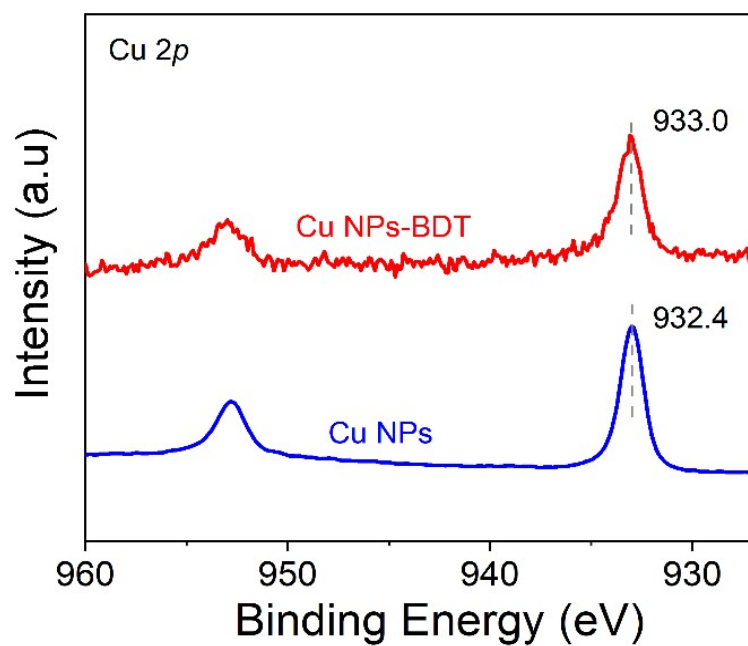

1

2 **Figure S7.** High-resolution Cu 2p spectra of Cu NPs-BDT and Cu NPs.

3

1

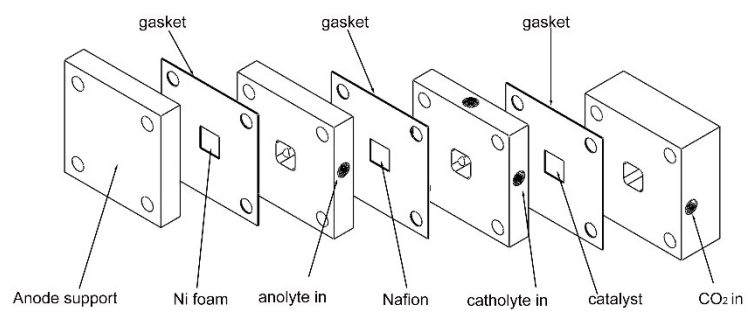

2 **Figure S8.** Illustration of the flow cell setup.

3

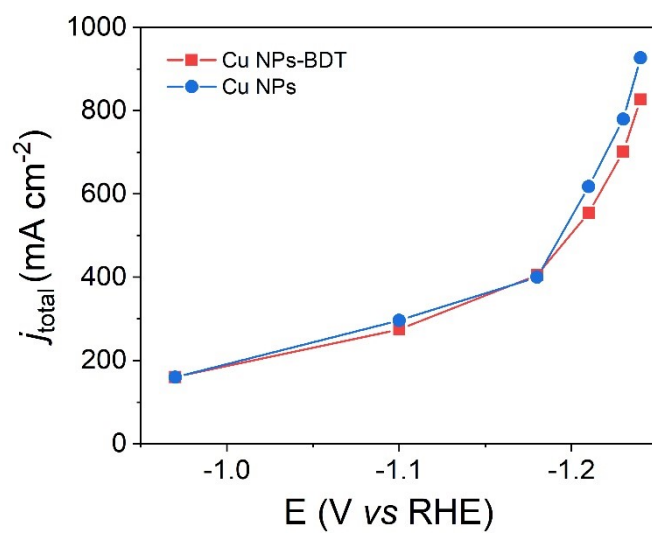

1  
2 **Figure S9.** Chronoamperometric curves at various potentials for CO<sub>2</sub> reduction on (a) Cu NPs-BDT  
3 and (b) Cu NPs in 1 M KOH electrolyte, respectively.

4

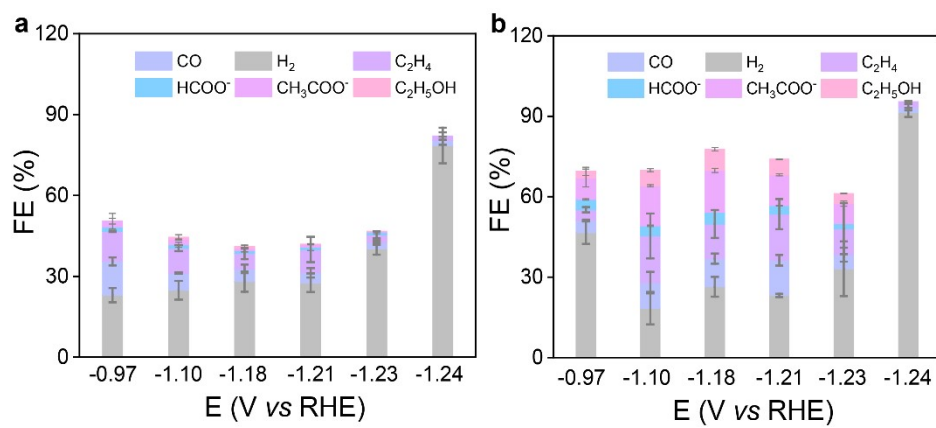

1

2 **Figure S10.** FEs of H<sub>2</sub>, CO, HCOO<sup>-</sup>, CH<sub>3</sub>COO<sup>-</sup>, C<sub>2</sub>H<sub>5</sub>OH toward CO<sub>2</sub>RR at different Voltages from  
 3 -0.97 V to -1.24 V (Vs RHE) on (a) Cu NPs-BDT and (b) Cu NPs.

4



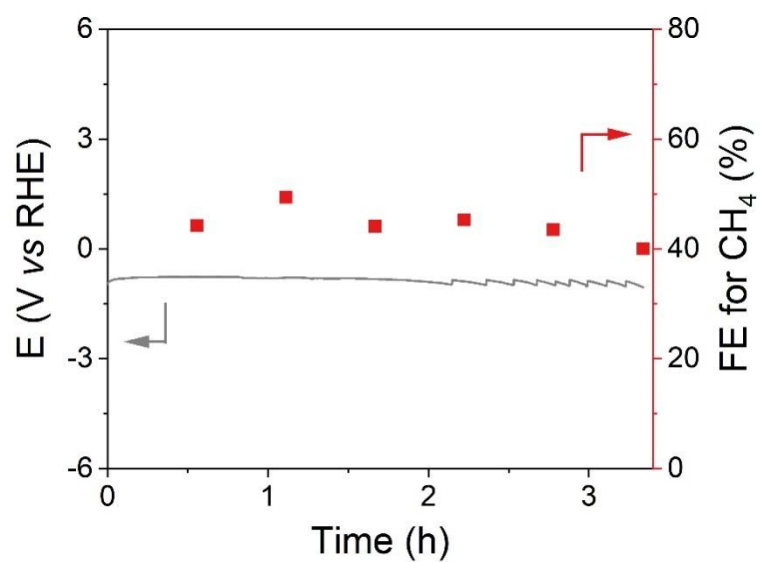

1

2 **Figure S11.** Plot of the voltage Performance test of CO<sub>2</sub>RR to methane during 3.3 hours of  
 3 electrolysis under the current density of 200 mA cm<sup>-2</sup> at 1M KOH.

4

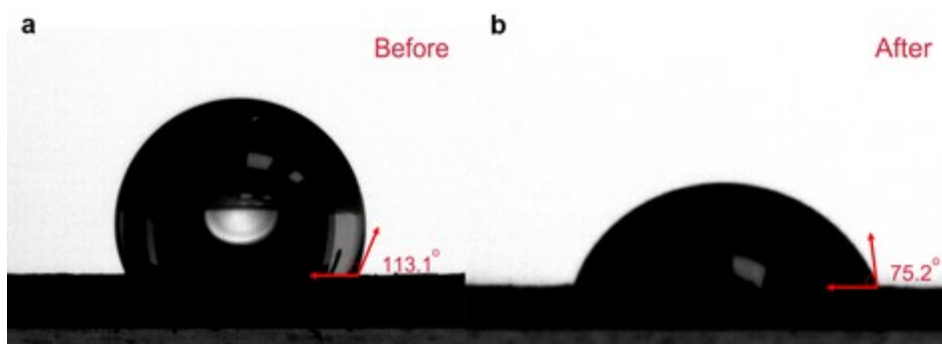

1  
2 **Figure S12.** The contact angle measurements on the back side of the gas diffusion layer that was  
3 used to support the catalysts (a) before CO<sub>2</sub>RR and (b) after 3.3-h electrolysis.  
4

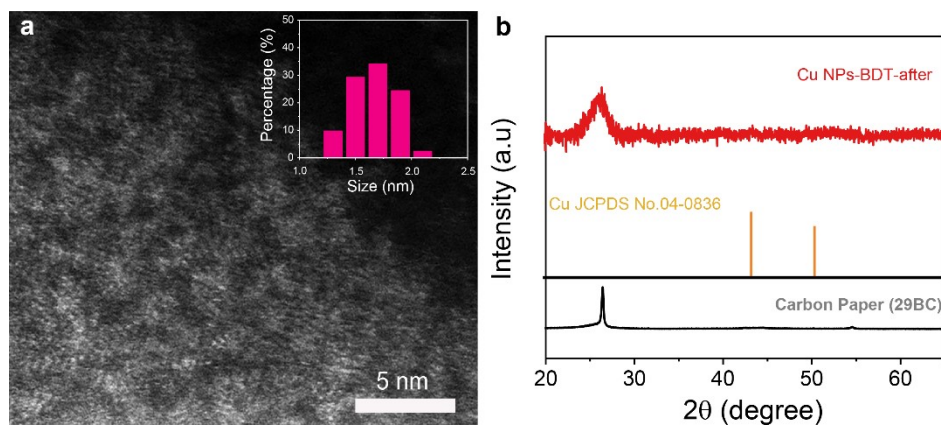

1

2 **Figure S13.** (a) High-resolution STEM of Cu NPs-BDT and (b) XRD pattern of Cu NPs-BDT after  
 3 after 3.3-h electrolysis.

4

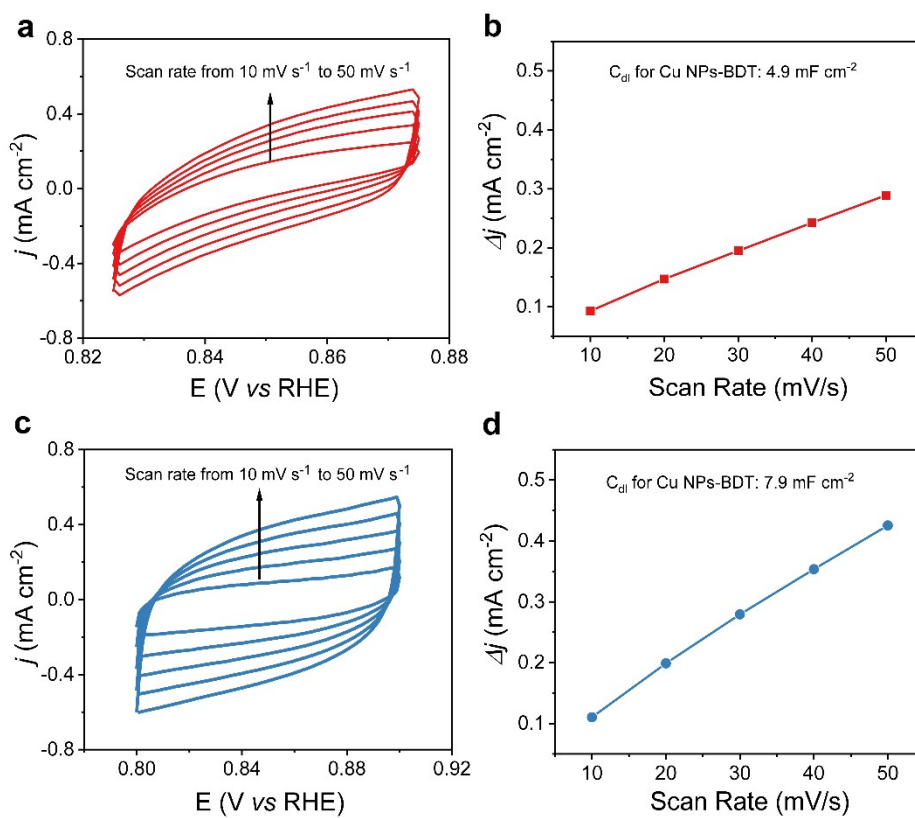

1

2 **Figure S14.** CV curves (a) and charge current density differences ( $\Delta j$ ) plotted against scan rates (b)  
 3 for Cu NPs-BDT. CV curves (c) and  $\Delta j$  plotted against scan rates (d) for Cu NPs.

4

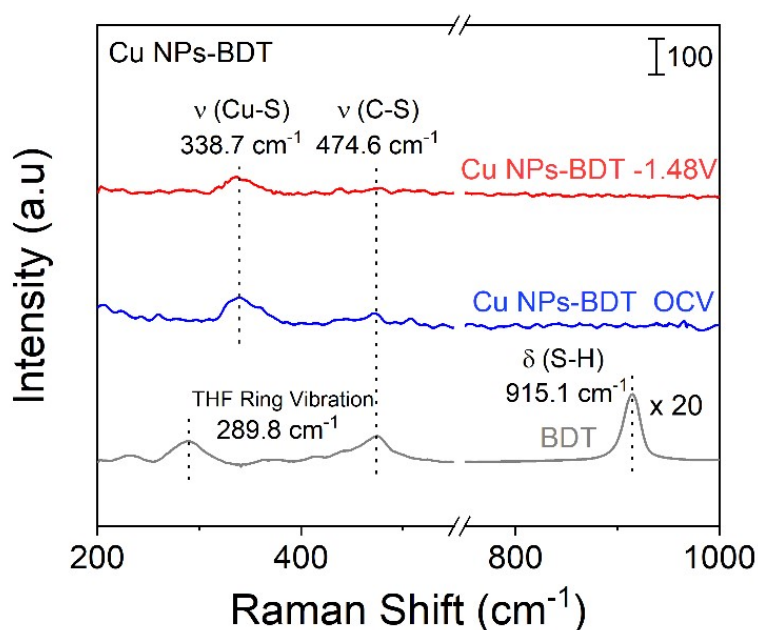

1  
2 **Figure S15.** *In situ* Raman spectra of Cu NPs-BDT were measured in 1 M KOH with a modified  
3 liquid-electrolyte flow rate. The peaks at  $338.7 \text{ cm}^{-1}$ ,  $474.6 \text{ cm}^{-1}$ , and  $915.1 \text{ cm}^{-1}$  was attributed to the  
4 Cu-S, C-S, and S-H stretching vibrations on the benzene ring, respectively.<sup>[7,8]</sup> Meanwhile, the peak  
5 at  $289.8 \text{ cm}^{-1}$  was attributed to the ring's vibration of tetrahydrofuran (THF).<sup>[9]</sup>  
6

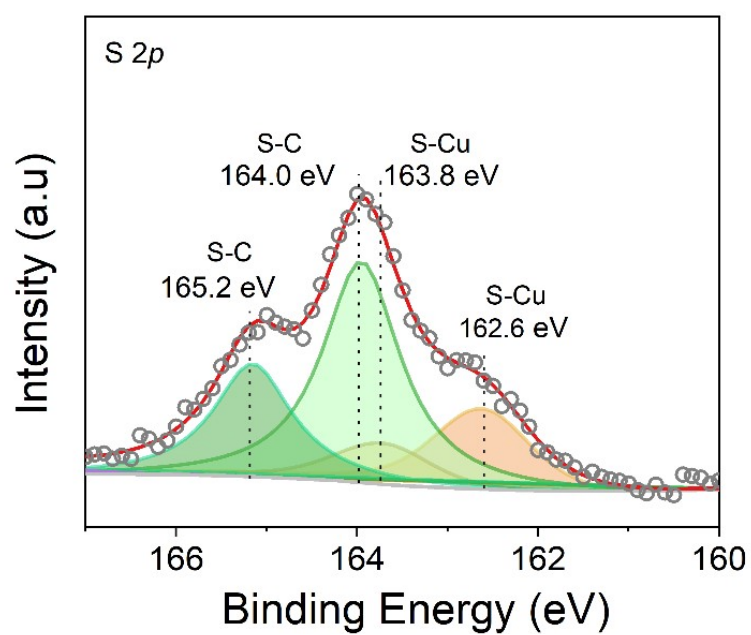

1

2 **Figure S16.** High-resolution XPS spectra of S 2p peaks of Cu NPs-BDT after 3.3-h electrolysis.

3

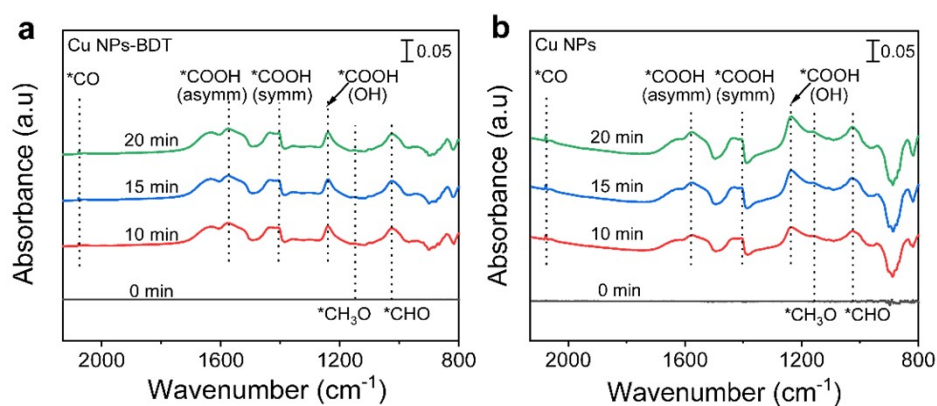

1

2 **Figure S17.** *In-situ* ATR-SEIRAS spectra toward CO<sub>2</sub> electroreduction over (a) Cu NPs-BDT and  
 3 (b) Cu NPs at -0.87 V vs RHE. The peaks at 1240 cm<sup>-1</sup>, 1404 cm<sup>-1</sup>, and 1574 cm<sup>-1</sup> could be attributed  
 4 to the OH deformation (\*COOH), symmetric stretch, and asymmetric stretch of the \*COOH group,  
 5 respectively.<sup>[10–13]</sup> Meanwhile, the signals that appeared at 1027 cm<sup>-1</sup>, 1155 cm<sup>-1</sup>, and 2078 cm<sup>-1</sup> might  
 6 be assigned to \*CHO, \*OCH<sub>3</sub>, and \*CO intermediate. <sup>[10–15]</sup>

7

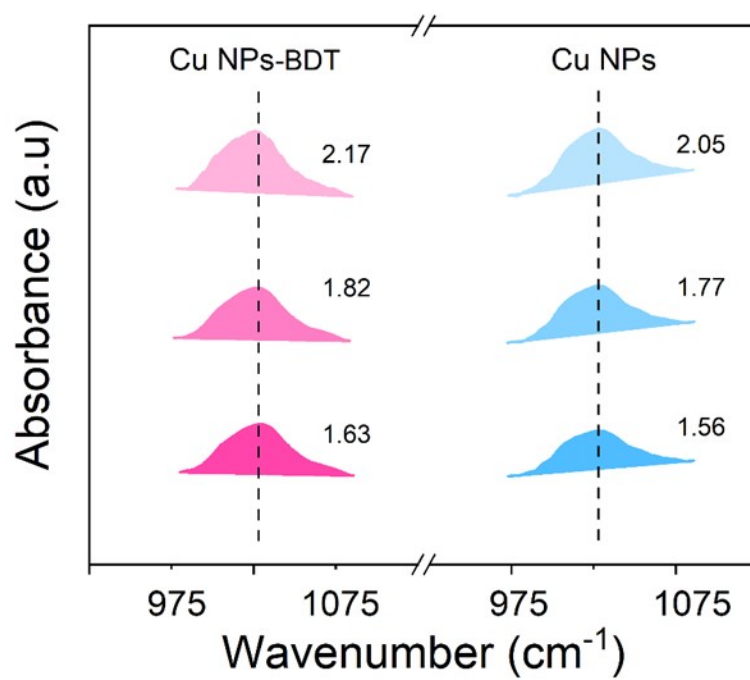

1

2 **Figure S18.** Integrated \*CHO peak areas in in situ ATR-SEIRAS spectra of Cu NPs-BDT and Cu  
 3 NPs at -0.87 V vs RHE for 10 min, 15 min, and 20 min.

4

5



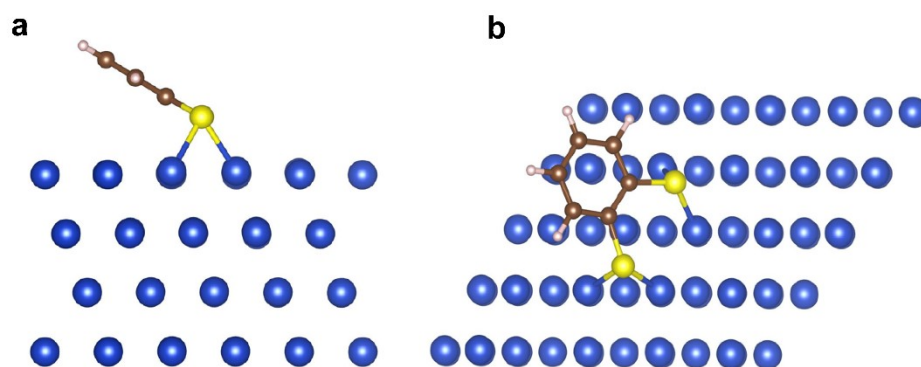

1

2 **Figure S19.** (a) Side view and (b) top view images of the optimized configuration of BDT-modified  
 3 Cu (111) Slab. Blue, dark yellow, brown, and pink balls stand for copper, sulfur, carbon, and  
 4 hydrogen atoms, respectively.

5

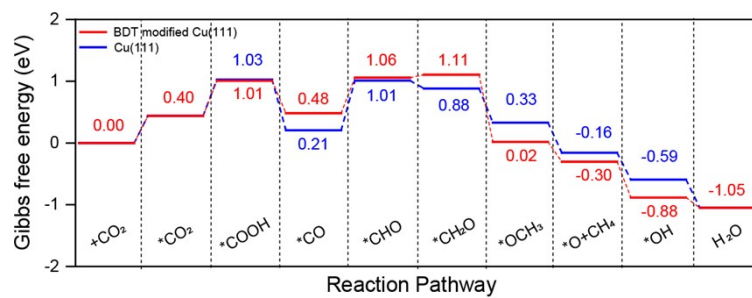

1  
2 **Figure S20.** The Gibbs free energies of CO<sub>2</sub>-to -CH<sub>4</sub> pathway on Cu (111) slab and BDT-modified  
3 Cu (111) slab under the surface coverage of 1/36 ML \*CO .

4

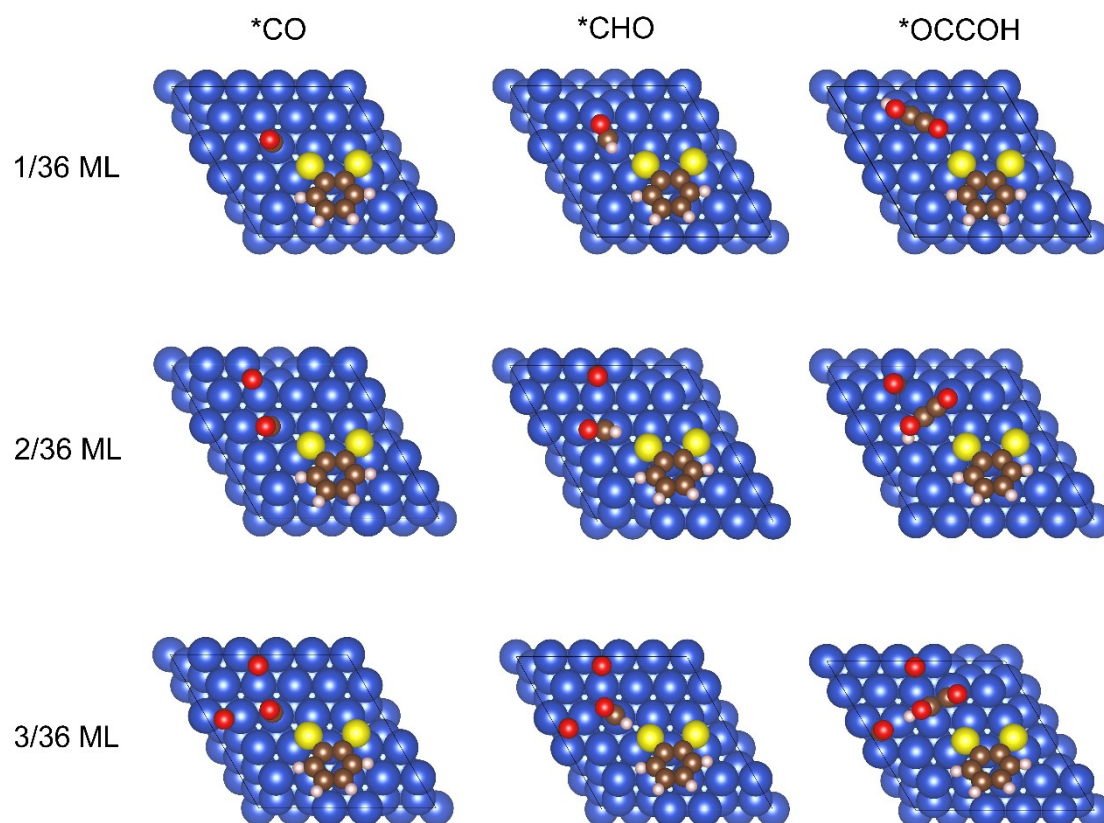

1

2 **Figure S21.** Adsorption configurations of  $\text{*CO}$ ,  $\text{*CHO}$ , and  $\text{*OCCOH}$  on BDT modified Cu (111)  
 3 surface with different  $\text{*CO}$  coverages. Blue, dark yellow, red, brown, and pink balls stand for copper,  
 4 sulfur, oxygen, carbon, and hydrogen atoms, respectively.

5

1 **Table S1.** The amount of Cu loading in as-prepared Cu NPs-BDT investigated by ICP-AES.

| Catalyst   | Cu (w.t.%) |
|------------|------------|
| Cu NPs-BDT | ~9.8       |

2

1 **Table S2.** Peak areas normalized by ECSA for \*CO with adsorption in *in situ* ATR-SEIRAS spectra  
 2 under the voltage of -0.87V vs RHE at different times.

| Catalyst   | Peak areas              |                         |                         |
|------------|-------------------------|-------------------------|-------------------------|
|            | 10 min                  | 15 min                  | 20 min                  |
| Cu NPs-BDT | 0.71 x 10 <sup>-4</sup> | 0.77 x 10 <sup>-4</sup> | 0.89 x 10 <sup>-4</sup> |
| Cu NPs     | 1.69 x 10 <sup>-4</sup> | 1.76 x 10 <sup>-4</sup> | 1.80 x 10 <sup>-4</sup> |

3

1 **Table S3.** Peak areas normalized by ECSA for \*CHO with adsorption in *in situ* ATR-SEIRAS spectra  
 2 under the voltage of -0.87V vs RHE at different times.

| Catalyst   | Peak areas |        |        |
|------------|------------|--------|--------|
|            | 10 min     | 15 min | 20 min |
| Cu NPs-BDT | 0.33       | 0.37   | 0.44   |
| Cu NPs     | 0.20       | 0.22   | 0.25   |

3

## 1 References

- 2 1. Y. Hokita, M. Kanzaki, T. Sugiyama, R. Arakawa and H. Kawasaki, *ACS Appl. Mater. Interfaces*,
- 3 2015, **7**, 19382–19389.
- 4 2. F. Li, W. Guo, Y. Si, Z. Li and Y. Fu, *Electrochim. Acta*, 2021, **370**, 137757.
- 5 3. F. Li, Y. C. Li, Z. Wang, J. Li, D.-H. Nam, Y. Lum, M. Luo, X. Wang, A. Ozden, S.-F. Hung, B.
- 6 Chen, Y. Wang, J. Wicks, Y. Xu, Y. Li, C. M. Gabardo, C.-T. Dinh, Y. Wang, T.-T. Zhuang, D.
- 7 Sinton and E. H. Sargent, *Nat. Catal.*, 2020, **3**, 75–82.
- 8 4. G. Kresse and J. Furthmüller, *Phys. Rev. B*, 1996, **54**, 11169–11186.
- 9 5. J. P. Perdew, K. Burke and M. Ernzerhof, *Phys. Rev. Lett.*, 1996, **77**, 3865–3868.
- 10 6. V. Wang, N. Xu, J.-C. Liu, G. Tang and W.-T. Geng, *Comput. Phys. Commun.*, 2021, **267**, 108033.
- 11 7. T. Y. K. William P. Griffith, *Spectrochim. Acta, Part A*, 1995, **51**, 253–267.
- 12 8. C. R. Andrew, H. Yeom, J. S. Valentine, B. G. Karlsson, G. van Pouderoyen, G. W. Canters, T.
- 13 M. Loehr, J. Sanders-Loehr and N. Bonander, *J. Am. Chem. Soc.*, 1994, **116**, 11489–11498.
- 14 9. B. Cadioli, E. Gallinella, C. Coulombeau, H. Jobic and G. Berthier, *J. Phys. Chem.*, 1993, **97**, 7844–
- 15 7856.
- 16 10. J.-D. Yi, R. Xie, Z.-L. Xie, G.-L. Chai, T.-F. Liu, R.-P. Chen, Y.-B. Huang and R. Cao, *Angew.*
- 17 *Chem. Int. Ed.*, 2020, **59**, 23641–23648.
- 18 11. X. Li, Y. Sun, J. Xu, Y. Shao, J. Wu, X. Xu, Y. Pan, H. Ju, J. Zhu and Y. Xie, *Nat. Energy*, 2019,
- 19 **4**, 690–699.
- 20 12. S. Chen, W.-H. Li, W. Jiang, J. Yang, J. Zhu, L. Wang, H. Ou, Z. Zhuang, M. Chen, X. Sun, D.
- 21 Wang and Y. Li, *Angew. Chem. Int. Ed.*, 2021, anie.202114450.
- 22 13. Y. Wang, M. Liu, G. Gao, Y. Yang, R. Yang, H. Ding, Y. Chen, S. Li and Y. Lan, *Angew. Chem.*
- 23 *Int. Ed.*, 2021, **60**, 21952–21958.
- 24 14. N. J. Firet and W. A. Smith, *ACS Catal.*, 2017, **7**, 606–612.
- 25 15. S. Zhu, T. Li, W.-B. Cai and M. Shao, *ACS Energy Lett.*, 2019, **4**, 682–689.

26

27
